# Supplementary material for: Immune complex–driven neutrophil activation and BAFF release: a link to B cell responses in SLE
Source: PubMed Central journal article supplement — Lupus Sci Med. 2022 Jul 19;9(1):e000709. doi: 10.1136/lupus-2022-000709 (PMC9301800; doi:10.1136/lupus-2022-000709), 2022-07-19
Supplement: lupus-2022-000709supp001.pdf [file lupus-2022-000709supp001.pdf]

**Supplemental Table 1**

Demographic and clinical variables for patients with systemic lupus erythematosus (SLE).

| Category                                        | Feature                                   | Patients with SLE (n=60) |
|-------------------------------------------------|-------------------------------------------|--------------------------|
| Demographic                                     | Age, years, median (range)                | 33 (19-61)               |
|                                                 | Female, n (%)                             | 53 (88.33)               |
| Disease variables                               | Rash, n (%)                               | 40 (66.7)                |
|                                                 | Oral ulcers, n (%)                        | 21 (35.0)                |
|                                                 | Arthritis, n (%)                          | 32 (53.3)                |
|                                                 | Polyserositis, n (%)                      | 13 (21.7)                |
|                                                 | Nephritis, n (%)                          | 16 (26.7)                |
|                                                 | Central nervous system involvement, n (%) | 1 (1.7)                  |
|                                                 | Hematological disorder*, n (%)            | 28 (46.7)                |
|                                                 | SLEDAI-2K, median (range)                 | 4 (0-22)                 |
|                                                 | Anti-dsDNA, IU/mL, mean $\pm$ SD          | 153.80 $\pm$ 336.00      |
|                                                 | C3, mg/dL, mean $\pm$ SD                  | 107.20 $\pm$ 28.47       |
|                                                 | C4, mg/dL, mean $\pm$ SD                  | 16.82 $\pm$ 12.03        |
|                                                 | CRP, mg/L, mean $\pm$ SD                  | 12.56 $\pm$ 46.00        |
|                                                 | WBC, x 10 <sup>9</sup> /L, mean $\pm$ SD  | 5.63 $\pm$ 2.29          |
|                                                 | Neutrophil %, mean $\pm$ SD               | 67.89 $\pm$ 12.59        |
| Neutrophil, x 10 <sup>9</sup> /L, mean $\pm$ SD | 3.90 $\pm$ 2.18                           |                          |
| Medications                                     | Prednisone, n (%)                         | 55 (91.67)               |
|                                                 | Antimalarials, n (%)                      | 51 (85.00)               |
|                                                 | Azathioprine, n (%)                       | 21 (35.00)               |
|                                                 | Mycophenolate mofetil, n (%)              | 20 (33.33)               |
|                                                 | Methotrexate, n (%)                       | 21 (35.00)               |

---

Cyclosporine, n (%)

9 (15.00)

---

Clinical variables and treatment recorded at first clinical assessment. Continuous variables are expressed as mean  $\pm$  standard deviation (SD) and categorical variables are displayed as number (percent). SLEDAI-2K: SLE Disease Activity Index; anti-dsDNA: anti-double stranded DNA; C3: complement component 3; C4: complement component 4; CRP: C-reactive protein; WBC: white blood cell. \*: anemia, leukopenia, and thrombocytopenia.

**Supplemental Table 2**

Antibodies used for flow cytometry

| Antibodies | Clone  | Company      |
|------------|--------|--------------|
| CD19       | HIB19  | BioLegend    |
| CD27       | LG.7F9 | E-Bioscience |
| CD38       | HB7    | E-Bioscience |
| CD86       | IT2.2  | BioLegend    |
| IgD        | IA6-2  | BioLegend    |

**Supplemental Table 3**

Clinical features of SLE patients at the time when blood was drawn for neutrophil and B cell co-culture experiment.

|                                    | SLE-1 | SLE-2  | SLE-3  | SLE-4  | SLE-5 |
|------------------------------------|-------|--------|--------|--------|-------|
| Gender                             | Male  | Female | Female | Female | Male  |
| Disease duration (years)           | 1     | 5      | 3      | 6      | 16    |
| Rash                               | NA    | -      | NA     | +      | NA    |
| Oral ulcers                        | NA    | -      | NA     | +      | NA    |
| Arthritis                          | NA    | +      | NA     | +      | NA    |
| Polyserositis                      | NA    | -      | NA     | -      | NA    |
| Nephritis                          | NA    | -      | NA     | +      | NA    |
| Central nervous system involvement | NA    | -      | NA     | -      | NA    |
| Hematological disorder*            | NA    | +      | NA     | +      | NA    |
| SLEDAI                             | NA    | 4      | NA     | 12     | NA    |
| Hydroxychloroquine                 | +     | +      | +      | +      | +     |
| Prednisone                         | +     | +      | +      | +      | -     |
| Mycophenolate mofetil              | +     | -      | +      | +      | +     |
| Tacrolimus                         | -     | -      | -      | +      | -     |

\*: anemia, leukopenia, and thrombocytopenia.

## Supplemental Figure 1

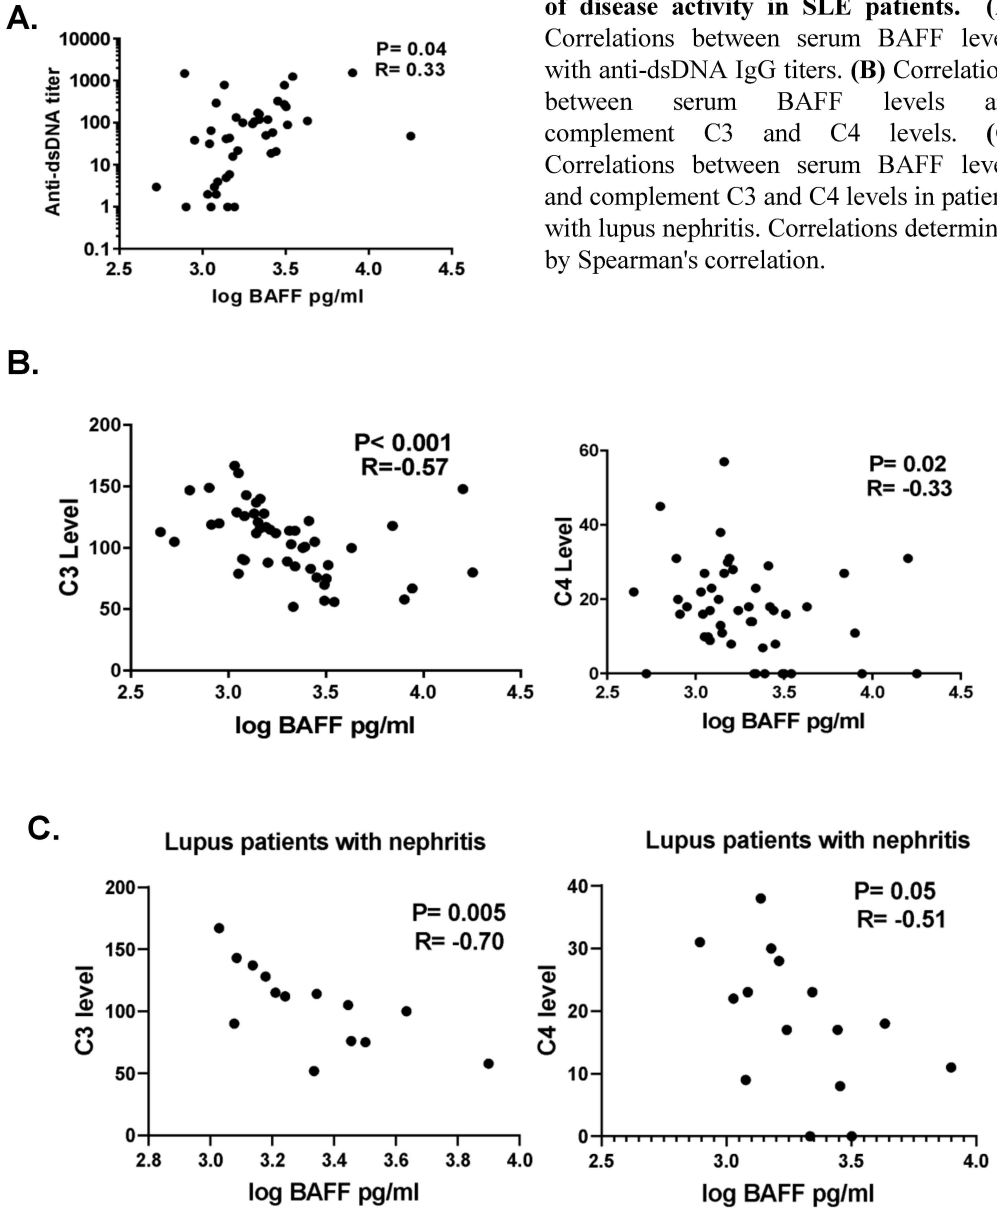

**Supplemental Figure 2**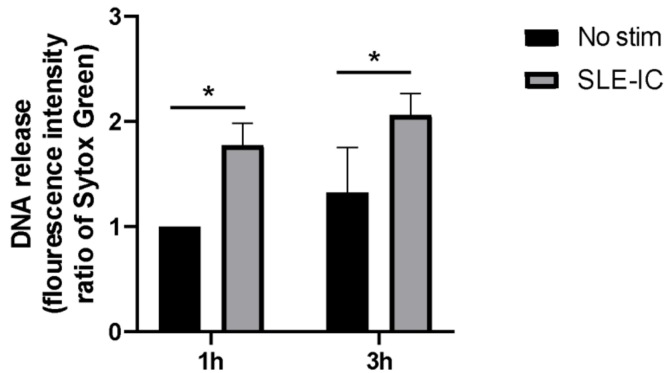

**Supplemental Figure 2. Immune complex (IC)-driven DNA release from neutrophils as a measure of NETs formation.** Neutrophils isolated from whole blood of SLE patients were left untreated or stimulated with SLE-ICs for 1 and 3 hours. DNA release were quantified by Sytox green labeling after enzymatic detachment of NETs. Summary data from three independent experiments. Shown are mean values  $\pm$  SD, \* $p < 0.05$ , by Student's paired *t*-test.

## Supplemental Figure 3

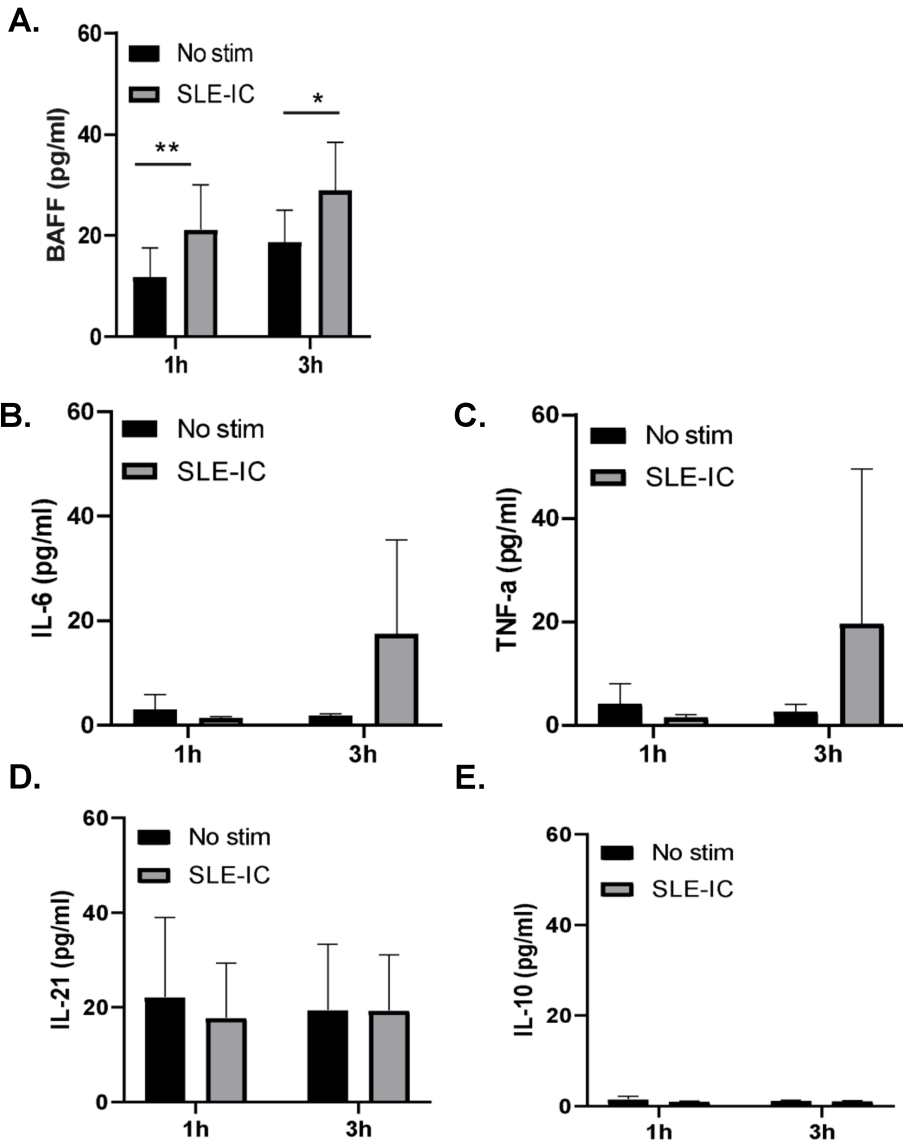

**Supplemental Figure 3. Cytokines production by neutrophils in response to SLE-IC stimulation *in vitro*.** Neutrophils isolated from whole blood of SLE patients were left untreated or stimulated with SLE-IC for 1 and 3 hours and cell-free supernatants were collected. (A-E) BAFF, IL-6, TNF- $\alpha$ , IL-21 and IL-10 production in the supernatants were measured by bead-based assay. Summary data from six independent experiments, using individual patients. Shown are mean values  $\pm$ SD. \* $p \leq 0.05$  and \*\* $p < 0.01$  by Student's paired *t*-test.

## Supplemental Figure 4

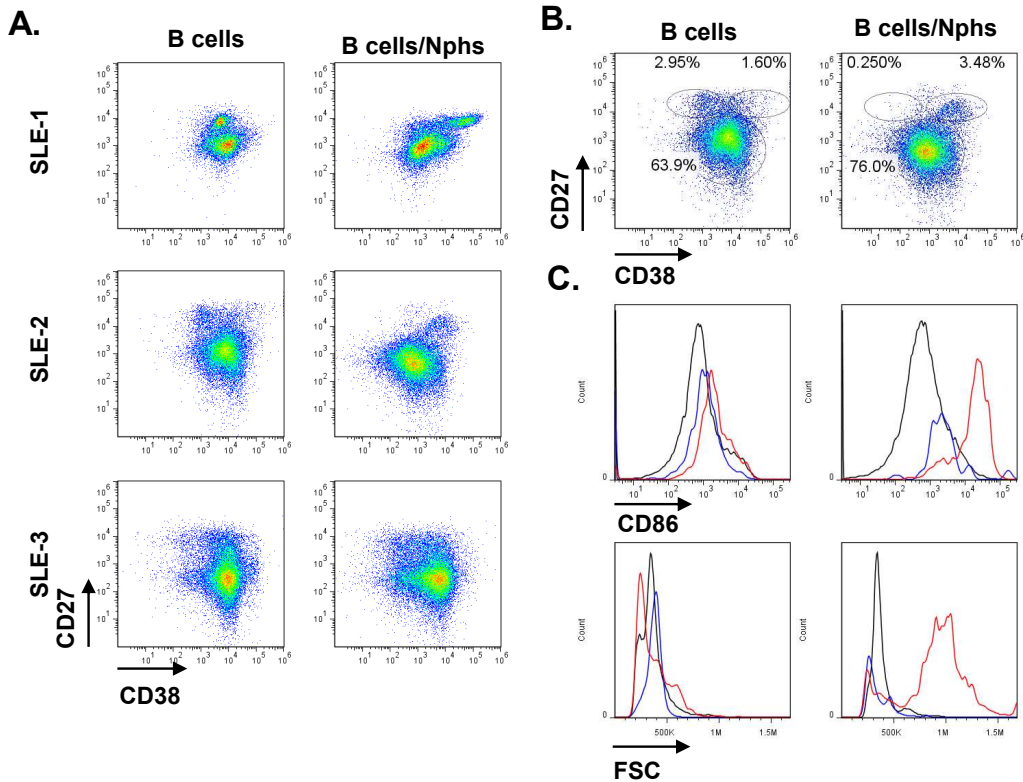

**Supplemental Figure 4. Neutrophils drive B cell differentiation *in vitro*.** B-cells isolated from PBMCs of SLE patients (n=5) were cultured alone (B cells), or co-cultured together with autologous neutrophils (B cells/Nphs) for 5 days and analyzed by flow cytometry. **(A)** Representative CD38/CD27 flow plots of gated live B cells in three individual SLE donors showing variations in the appearance of CD27<sup>hi</sup>CD38<sup>hi</sup> in B cell/neutrophil co-cultures. **(B)** Analysis of B cell subsets, identified based on CD38 and CD27 expression (one representative SLE donor). **(C)** Histograms show CD86 expression, or FCS-A (forward scatter) of gated B cell subsets: CD27<sup>lo</sup>CD38<sup>int/lo</sup> (black lines), CD27<sup>hi</sup>CD38<sup>lo</sup> (blue lines), and CD27<sup>hi</sup>CD38<sup>hi</sup> (red lines).
